# Supplementary material for: Racial/Ethnic Disparities in Childhood Cancer Survival in the United States
Source: Oxford University Press journal article supplement (doi:10.1158/1055-9965.epi-21-0117), 2021-09-30
Supplement: 10559965epi210117-sup-259680_4_supp_7308893_qxfkvk.docx [file 10559965epi210117-sup-259680_4_supp_7308893_qxfkvk.docx]

Supplementary Table 1. Survival disparity by race and ethnicity and the Affordable Care Act

|  | Unadjusted estimates | Multivariable model adjusted for age group, sex, region, MSA, year of diagnosis, and number of conditions other than cancer | Multivariable model with additional adjustment for health insurance | Multivariable model with additional adjustment for Social Deprivation Index | Multivariable model with additional adjustment for health insurance, and Social Deprivation Index |
| --- | --- | --- | --- | --- | --- |
|  | HR of mortality | HR of mortality | HR of mortality | HR of mortality | HR of mortality |
| Pre-ACA (2004-2013) |  |  |  |  |  |
| NH Black vs NH White |  |  |  |  |  |
| All cancers combined | 1.39(1.32 - 1.46) | 1.36(1.29 - 1.43) | 1.27(1.21 - 1.34) | 1.29(1.22 - 1.36) | 1.23(1.17 - 1.31) |
| Leukemia and lymphoma | 1.56(1.42 - 1.72) | 1.48(1.33 - 1.63) | 1.37(1.23 - 1.52) | 1.36(1.22 - 1.52) | 1.29(1.15 - 1.44) |
| Brain tumors | 1.4(1.28 - 1.52) | 1.36(1.24 - 1.48) | 1.28(1.17 - 1.4) | 1.3(1.19 - 1.44) | 1.25(1.14 - 1.38) |
| Solid tumors | 1.22(1.13 - 1.32) | 1.22(1.13 - 1.32) | 1.17(1.08 - 1.27) | 1.18(1.08 - 1.29) | 1.14(1.05 - 1.25) |
| Hispanic vs NH White |  |  |  |  |  |
| All cancers combined | 1.15(1.09 - 1.2) | 1.15(1.1 - 1.21) | 1.1(1.04 - 1.16) | 1.1(1.05 - 1.16) | 1.05(1 - 1.11) |
| Leukemia and lymphoma | 1.29(1.18 - 1.4) | 1.36(1.24 - 1.48) | 1.22(1.11 - 1.34) | 1.24(1.13 - 1.37) | 1.15(1.04 - 1.27) |
| Brain tumors | 1.29(1.18 - 1.4) | 1.25(1.15 - 1.36) | 1.19(1.08 - 1.3) | 1.2(1.1 - 1.32) | 1.17(1.06 - 1.28) |
| Solid tumors | 1.09(1 - 1.18) | 1.11(1.02 - 1.21) | 1.04(0.95 - 1.13) | 1.07(0.98 - 1.17) | 1.02(0.93 - 1.12) |
| NH other vs NH White |  |  |  |  |  |
| All cancers combined | 1.12(1.04 - 1.21) | 1.15(1.06 - 1.24) | 1.12(1.04 - 1.22) | 1.13(1.05 - 1.23) | 1.11(1.02 - 1.2) |
| Leukemia and lymphoma | 1.13(0.97 - 1.3) | 1.21(1.04 - 1.4) | 1.15(0.99 - 1.34) | 1.17(1.01 - 1.36) | 1.13(0.97 - 1.31) |
| Brain tumors | 1.23(1.08 - 1.4) | 1.19(1.05 - 1.36) | 1.18(1.03 - 1.34) | 1.2(1.05 - 1.36) | 1.17(1.03 - 1.34) |
| Solid tumors | 1.08(0.95 - 1.22) | 1.15(1.01 - 1.31) | 1.11(0.98 - 1.26) | 1.13(0.99 - 1.28) | 1.11(0.97 - 1.26) |
| Post-ACA (2014-2015) |  |  |  |  |  |
| NH Black vs NH White |  |  |  |  |  |
| All cancers combined | 1.44(1.26 - 1.65) | 1.39(1.21 - 1.6) | 1.34(1.16 - 1.55) | 1.37(1.18 - 1.59) | 1.34(1.15 - 1.56) |
| Leukemia and lymphoma | 1.62(1.23 - 2.14) | 1.52(1.13 - 2.03) | 1.41(1.05 - 1.89) | 1.5(1.11 - 2.04) | 1.4(1.02 - 1.91) |
| Brain tumors | 1.51(1.22 - 1.88) | 1.4(1.12 - 1.76) | 1.43(1.13 - 1.81) | 1.39(1.09 - 1.77) | 1.41(1.1 - 1.81) |
| Solid tumors | 1.29(1.04 - 1.61) | 1.27(1.01 - 1.59) | 1.23(0.97 - 1.55) | 1.27(1 - 1.62) | 1.24(0.97 - 1.58) |
| Hispanic vs NH White |  |  |  |  |  |
| All cancers combined | 1.2(1.06 - 1.35) | 1.18(1.04 - 1.35) | 1.12(0.98 - 1.28) | 1.16(1.01 - 1.33) | 1.11(0.96 - 1.27) |
| Leukemia and lymphoma | 1.34(1.05 - 1.7) | 1.34(1.04 - 1.72) | 1.23(0.95 - 1.6) | 1.31(1 - 1.72) | 1.2(0.91 - 1.59) |
| Brain tumors | 1.34(1.09 - 1.65) | 1.26(1.02 - 1.57) | 1.22(0.98 - 1.53) | 1.26(1 - 1.59) | 1.22(0.97 - 1.55) |
| Solid tumors | 1.19(0.97 - 1.46) | 1.21(0.98 - 1.5) | 1.13(0.91 - 1.4) | 1.16(0.93 - 1.45) | 1.11(0.88 - 1.4) |
| NH other vs NH White |  |  |  |  |  |
| All cancers combined | 1.18(0.98 - 1.41) | 1.18(0.98 - 1.42) | 1.16(0.96 - 1.39) | 1.17(0.97 - 1.41) | 1.16(0.96 - 1.4) |
| Leukemia and lymphoma | 1.14(0.79 - 1.64) | 1.2(0.82 - 1.75) | 1.13(0.77 - 1.65) | 1.18(0.81 - 1.73) | 1.13(0.78 - 1.66) |
| Brain tumors | 1.24(0.91 - 1.68) | 1.11(0.81 - 1.51) | 1.16(0.85 - 1.58) | 1.15(0.84 - 1.56) | 1.15(0.84 - 1.57) |
| Solid tumors | 1.34(1 - 1.79) | 1.34(0.99 - 1.81) | 1.32(0.98 - 1.78) | 1.34(1 - 1.81) | 1.33(0.99 - 1.79) |

Note: NH, non-Hispanic; HR, hazard ratio (of death); CI, confidence interval. Non-Hispanic White was the reference group.
