# Supplementary material for: Racial/Ethnic Disparities in Childhood Cancer Survival in the United States
Source: Oxford University Press journal article supplement (doi:10.1158/1055-9965.epi-21-0117), 2021-09-30
Supplement: 10559965epi210117-sup-259680_4_supp_7308896_qxfkvk.docx [file 10559965epi210117-sup-259680_4_supp_7308896_qxfkvk.docx]

**Supplementary Table 4**. Childhood cancer survival by social deprivation index and health insurance.

|  | All cancer sites combined | | Leukemia and lymphoma | | Brain tumors | | Solid tumors | |
| --- | --- | --- | --- | --- | --- | --- | --- | --- |
| HR | 95% CI | HR | 95% CI | HR | 95% CI | HR | 95% CI |
| **Social deprivation index** | | | | | | |  |  |
| 1-33% | 1.00 |  | 1.00 |  | 1.00 |  | 1.00 |  |
| 34-66% | **1.16** | **1.11 - 1.21** | **1.19** | **1.10 - 1.30** | **1.11** | **1.03 - 1.19** | **1.16** | **1.09 - 1.24** |
| 67-100% | **1.27** | **1.22 - 1.32** | **1.44** | **1.33 - 1.56** | **1.27** | **1.19 - 1.37** | **1.16** | **1.08 - 1.23** |
| **By health insurance** | | | | | | |  |  |
| Private insurance | 1.00 |  | 1.00 |  | 1.00 |  | 1.00 |  |
| Medicaid | **1.25** | **1.21 - 1.30** | **1.41** | **1.33 - 1.51** | **1.26** | **1.19 - 1.33** | **1.16** | **1.10 - 1.23** |
| Uninsured | **1.30** | **1.18 - 1.44** | **1.38** | **1.14 - 1.66** | **1.38** | **1.17 - 1.63** | **1.23** | **1.05 - 1.46** |

Note: HR, hazard ratio. CI, confidence interval. Unadjusted Cox proportional hazard models were used to calculate the hazard ratios of mortality.
