# Supplementary material for: Racial/Ethnic Disparities in Childhood Cancer Survival in the United States
Source: Oxford University Press journal article supplement (doi:10.1158/1055-9965.epi-21-0117), 2021-09-30
Supplement: 10559965epi210117-sup-259680_4_supp_7308900_qxfkvk.docx [file 10559965epi210117-sup-259680_4_supp_7308900_qxfkvk.docx]

**Supplementary Figure 2**. Proposed Causal diagram of race/ethnicity, socioeconomic status, health insurance, and cancer survival.

Black Solid lines represent the SES mediation pathway: Race/ethnicity🡪SES🡪 survival and Race/ethnicity🡪SES🡪health insurance🡪 survival; Gray long dashes represent the health insurance? mediation pathway: Race/ethnicity🡪health insurance🡪 survival; light gray dash-dots represent the direct effect: Race/ethnicity🡪 survival

Race/ethnicity

Socioeconomic status

(Social deprivation)

Health Insurance

Cancer survival
